|                                                                                                                                       |    |
|---------------------------------------------------------------------------------------------------------------------------------------|----|
| <b>Epigenetic aging waves:</b>                                                                                                        | 1  |
| <b>Artificial intelligence detects clustering of switch points in DNA</b>                                                             | 2  |
| <b>methylation rate in defined sex-dependent age periods</b>                                                                          | 3  |
| Elad Segev <sup>1,2#</sup> , Tamar Shahal <sup>1#</sup> , Thomas Konstantinovsky <sup>1,3#</sup> , Yonit Marcus <sup>1,4</sup> , Gabi | 4  |
| Shefer <sup>1</sup> , Yuval Ebenstein <sup>1,5</sup> , Metsada Pasmanik-Chor <sup>6</sup> , Naftali Stern <sup>1,4</sup>              | 5  |
|                                                                                                                                       | 6  |
| 1. The Sagol Center for Epigenetics of Aging and Metabolism, Institute of                                                             | 7  |
| Endocrinology, Metabolism and Hypertension, Tel Aviv-Sourasky Medical Center;                                                         | 8  |
| Sackler Faculty of Medicine, Tel Aviv University, Israel.                                                                             | 9  |
| 2. Department of Applied Mathematics, Holon Institute of Technology, Israel                                                           | 10 |
| 3. Department of Engineering, Bar Ilan University, Israel                                                                             | 11 |
| 4. The Sackler Faculty of Medicine, Tel-Aviv University, Israel                                                                       | 12 |
| 5. Department of Chemistry, Tel Aviv University, Israel.                                                                              | 13 |
| 6. Bioinformatics Unit, The George S. Wise Faculty of Life Science, Tel Aviv                                                          | 14 |
| University, Israel                                                                                                                    | 15 |
|                                                                                                                                       | 16 |
| #contributed equally                                                                                                                  | 17 |
| Correspondence: Naftali Stern, MD, The Sagol Center for Epigenetics of Metabolism and                                                 | 18 |
| Aging, Institute of Endocrinology, Metabolism and Hypertension, Tel Aviv Sourasky                                                     | 19 |
| Medical Center Sackler Faculty of Medicine, Tel Aviv University, Israel, Tel: 972-3-                                                  | 20 |
| 6973732 ; Fax: 972-3-6973035, e-mail: naftalis@tlvmc.gov.il                                                                           | 21 |
|                                                                                                                                       | 22 |

**Abstract** 23

Background: Aging is linked to hypermethylation of CpG sites on promoters and enhancers, 24  
along with loss of methylation in intergenic zones. That such changes are not necessarily a 25  
continuous process is exemplified by the extensive changes in DNA methylation during 26  
development with another significant time of change during adolescence. However, the 27  
relation between age and DNA methylation during adult life has not been systematically 28  
evaluated. In particular, potential changes in methylation trends in the same CpGs over the 29  
years that may occur with aging remain largely unexplored. 30

Methods: Here we set out to determine the average trends by age of the CpG sites represented 31  
in the Illumina 450 platform, based on data from 2143 subjects of the age range of 20 to 80 32  
years, compiled from 24 different cohorts. Using several mathematical procedures, we 33  
initially separated stationary probes from probes whose methylation changes with age. Among 34  
the latter, representing ~20% of the probes, we then focused on the identification of CpG sites 35  
with switch points, i.e., a point where a stable trend of change in the age-averaged methylation 36  
is replaced by another linear trend. 37

Results: Using several mathematical modeling steps, we generated a machine learning model 38  
that identified 5175 CpG sites with switch points in age-related changes in the trend of 39  
methylation over the years. Switch points reflect acceleration, deceleration or change of 40  
direction of the alteration of methylation with age. The 5175 switch points were limited to 41  
2813 genes in three waves, 80% of which were identical in men and women. A medium-size 42  
wave was seen in the early forties, succeeded by a dominant wave as of the late fifties, lasting 43  
up to 8 years each. Waves appeared ~4-5 years earlier in men. No switch points were detected 44  
on CpGs mapped to the X chromosome. 45

Conclusion: In non-stationary CpG sites, concomitant switch points in age related changes in 46  
methylations can be seen in a defined group of sites and genes, which cluster in 3 age- and 47  
sex- specific waves. 48

49

50

51

52

53

54

55

56

57

58

59

60

61

62

63

64

65

## **Introduction**

66

Age-related changes in DNA methylation have been recognized for more than four decades 67  
(1–3). In brief, global DNA methylation declines from the onset of adulthood to advanced age 68  
(4–7), but this trend is comprised of two opposing vectors: CpG sites with overall low DNA 69  
methylation, such as promoter-associated CpG islands, tend to increase methylation with age, 70  
whereas hypermethylated DNA zones, such as intergenic non-island CpGs tend to lose 71  
methylation with age. The resultant overall decrease in global DNA methylation with age 72  
reflects the fact that CpGs residing outside of CpG islands and tend to be hypermethylated 73  
outnumber the CpG sites in the CpG islands, whose methylation level rises with the passage 74  
of time (8-10). This also leads to a gradual shift in DNA methylation levels toward the mean 75  
with increasing age (8–12). Age-related changes in DNA methylation tend to occur 76  
preferentially at CpG island shores and shelves and enhancers (13). That certain CpG sites are 77  
closely and linearly related to age has been utilized by Horvath et al (4,5), Hannum (11), and 78  
Weidner et al (12) to formulate the concept of age/time related epigenetic clocks, according 79  
to which an epigenetic age, in years, can be mathematically derived from specific CpG sites 80  
such that it approximately parallels the chronological age. Shahal et al. (14) subsequently 81  
deconvoluted the Horvath's epigenetic clock to its components, showing significant inter- 82  
individual variability. Furthermore, a large body of work now links upward drifting from the 83  
epigenetic age, which reflects accelerated epigenetic aging, to earlier mortality, decreased 84  
healthy longevity and a number of diseases, such as breast cancer (15–21). Since most 85  
epigenome-wide DNA methylation data is now based on large platforms identifying the level 86  
of methylation in predefined CpG sites, it is of interest that Florath et al (7) who analyzed 87  
>480000 CpG sites in whole blood DNA of a population-based cohort study aged between 50 88  
and 75 years, found only 162 CpG sites with the high Spearman correlation coefficients 89  
( $R > 0.6$ ) between DNA methylation and age. 90

Whereas these and likely other CpG sites selected to comprise the basis for "epigenetic clocks" 91  
apparently serve as excellent aging markers, or may even be causatively linked to the aging 92  
process, they are obviously too few to account for the large age-related changes seen in DNA 93  
methylation. Because many reports revealed the linear relation to age and its link to health 94  
conditions, we sought, in the present report, to explore the overall pattern/s of changes in DNA 95  
methylation as a function of age. However, non-linear changes in DNA methylation with age 96  
have been previously reported in humans (22) and canids (23). Extreme examples of large 97  
changes in DNA methylation are known to occur in specific ages in early life: after birth, 98  
average DNA methylation levels increase in blood throughout the first year of life (24,25). 99  
Likewise, during adolescent transition changes in DNA methylation were observed in more 100  
than 15000 CpGs, many of which were associated with genes relevant to cell growth and 101  
immune system development (26). 102

In the present study we pursued the following aims: 1) To identify non-stationary CpG 103  
sites, i.e., all CpG methylation sites that undergo detectable age-related changes between the 104  
age of 20 and 80 years. 2) To identify CpG sites with age-related switch point (SP), i.e., CpG 105  
sites whose methylation fraction changes in a curvilinear manner such that changes in DNA 106  
methylation are either accelerated, decelerated or switch their trend direction at a certain age. 107  
3) To investigate the possibility that acceleration or deceleration in methylation cluster around 108  
defined age-related zones (e.g., perimenopause). To this aim we used a compiled data base 109  
constructed of 24 different published cohorts who all used the Illumina 450K human DNA 110  
methylation platform. 111

## **Methods** 112

We extracted data from published databases and performed several analytical procedures 113  
resulting in the development of an artificial model that can identify the CpGs with a SP 114

(epigenetic switch point; ESP) in their mean methylation fraction between the ages of 20 and 115

80 years. The entire process is described in Fig1. 116

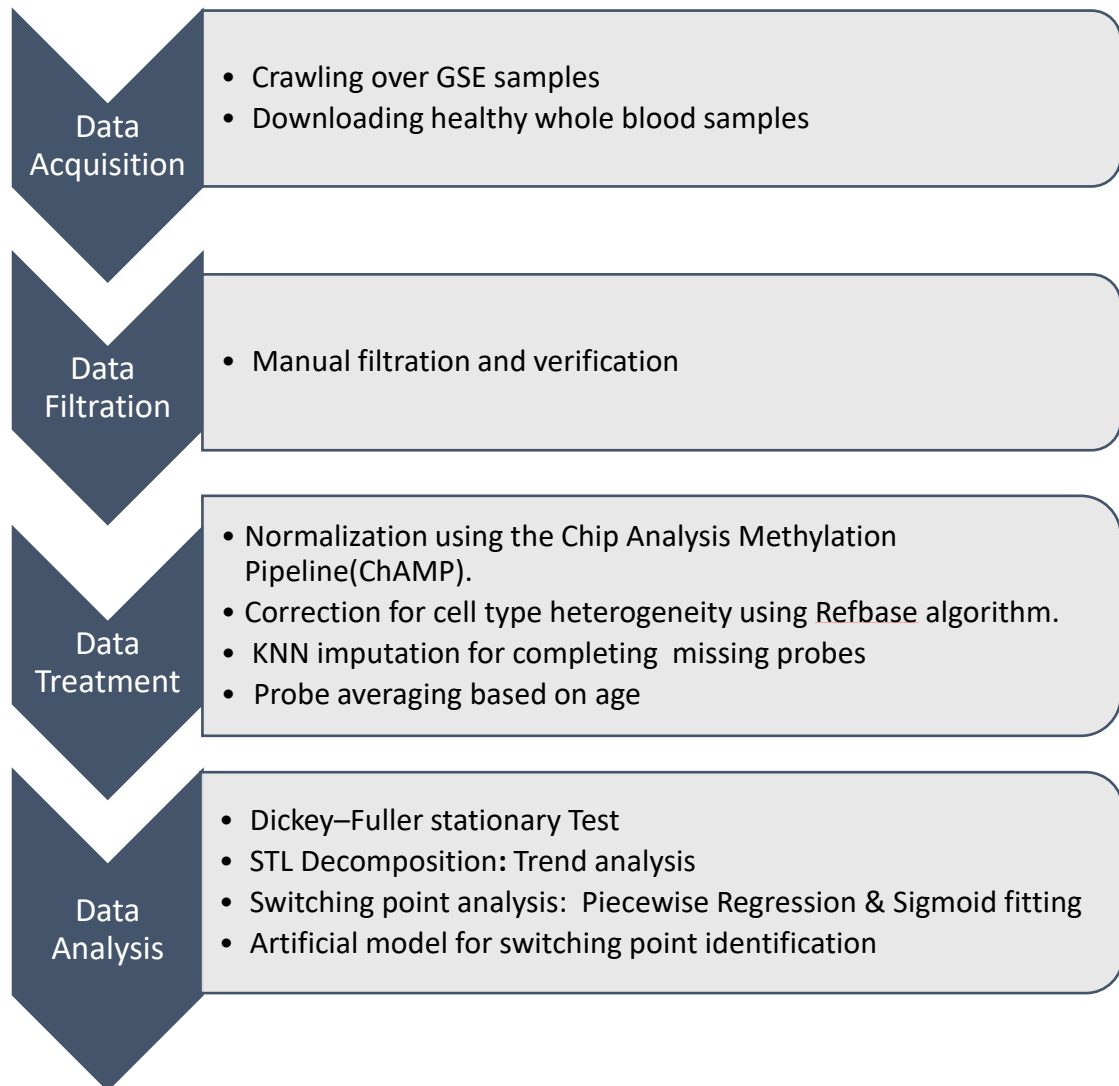

117

**Figure 1:** A schematic overview of the data extraction and analytical procedures used for the 118

identification of ESP. 119

**Data acquisition and processing** 120

1. *Crawling over GSE samples:* We used an extensive automatic web crawler to search for 121

all available repositories that match our query for whole blood and healthy subjects at the 122

|                                                                                                       |     |
|-------------------------------------------------------------------------------------------------------|-----|
| age range of 20–80 years (14) from the Gene Expression Omnibus (GEO) Data sets                        | 123 |
| repository.                                                                                           | 124 |
| 2. <i>Downloading healthy whole blood samples</i> : All relevant $\beta$ values and idat values were  | 125 |
| downloaded, Samples with idat values were converted to $\beta$ values using champ package             | 126 |
| (27)                                                                                                  | 127 |
|                                                                                                       | 128 |
| 3. <i>Data Filtration and verification</i> : All samples were manually inspected. Samples from        | 129 |
| datasets that were not labeled as healthy and contained case-control groups were manually             | 130 |
| examined to ensure that control samples were indeed healthy. The entire process yielded               | 131 |
| a total of 2221 samples from 24 different data sets, which were then subjected to further             | 132 |
| analysis                                                                                              | 133 |
| 4. <i>Data treatment</i> : The $\beta$ values of all filtered samples were normalized using BMIQ code | 134 |
| “champ.norm” implemented at Champ package (28).                                                       | 135 |
| 5. <i>Correction for cell type heterogeneity</i> : We corrected for cell type heterogeneity using     | 136 |
| "champ.refbase" implemented at Champ package (29).                                                    | 137 |
| 6. <i>K-nearest neighbors' algorithm [KNN] for completing 47 missing probes</i> : To maximize         | 138 |
| the preservation of CpG sites and remove poor-quality samples across the different                    | 139 |
| datasets we used a k-nearest neighbors' algorithm (KNN) based approach. To infer the                  | 140 |
| degree of relative similarity between the different samples based on their CpG site $\beta$           | 141 |
| values, the sample-linked gender, age and the percentage of missing CpG sites were                    | 142 |
| entered. In the process of searching for the nearest neighbors sharing the same metadata              | 143 |
| (age, gender, similar $\beta$ values) and emplacing the missing $\beta$ values with the values of the | 144 |
| closest neighbor, 47 samples could be thus adjusted and were retained. However, 78 other              | 145 |
| samples for which no nearest neighbor were removed from our dataset. The entire process               | 146 |
| yielded a total of 2221 samples from 24 different data sets, which were then subjected to             | 147 |

further analysis (table 1S). Of the resulting 2143 samples, 1119 were females and 1024 148  
males, with an age distribution presented in figure S1, supplementary file S1. 149

7. *Probe averaging based on age:* Probes missing in more than 1% of our dataset were 150  
filtered out, leaving 341,247 probes. The 2143 samples were tabulated by age and the 151  
average  $\beta$  for each CpG site was calculated for each age (in years, between 20-80). This 152  
data structure allowed us to remove noise and converge to age-specific trends. Moreover, 153  
it reduced the data spread from 2143 columns for each of the 341,247 probs to 61 154  
columns, a ~35-fold condensation which allowed more extensive calculations. Hence, we 155  
ended up handling a data set of 61 columns, one column for each year of age (20-80 years) 156  
with a mean  $\beta$  value for each CpG site in each of the cells. This data representation not 157  
only reduced the size of the data analyzed but also can be viewed as a signal sampled with 158  
a frequency of 1 year, which allows the usage of a vast variety of tools, algorithms and 159  
mathematical models derived from the branches of time series analysis to uncover hidden 160  
aging patterns that may appear as methylation  $\beta$  values. An example as to how such a 161  
signal of a CpG site looks before and after the averaging can be seen in Figure 3A, B, E, 162  
F. 163



8. *Dickey–Fuller stationary Test*: Since we strived to focus on CpG sites that undergo significant change over the age years of 20-80, we applied the augmented Dickey–Fuller test, which afforded the identification of stationary probes, i.e., probes that do not change significantly ( $p < 0.05$ ) in terms of their means, standard deviations (SD) as well as seasonal (cyclic, sinus-like) behavior. This is conceptually depicted in Figure 2, in which 4 hypothetical probes are presented. The black curve represents a stationary probe which undergoes no significant change in the beta value or SD. Such hypothetical signal probes can be statistically described as discrete variables with normal distribution and a given mean and SD. Since there is no significant change across the years, in either the beta value or the SD, these probes were not further considered for evaluation in the present report.

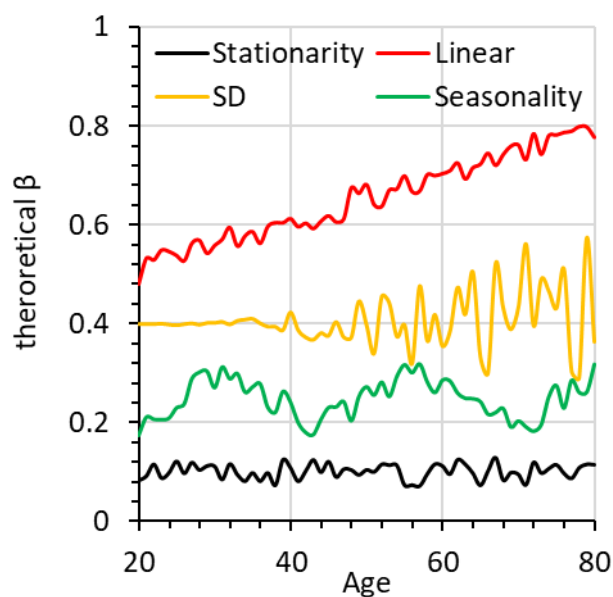

On the other hand, the red orange and green curves are non-stationary signals representing change in beta value, SD, or seasonality behavior (sine function-like behavior), respectively, over time. In all, this analysis revealed 69,275 "non-stationary" CpG sites.

**Figure2:** Four hypothetical CpG signals: in black, a stationary signal; the red, orange and green curves exemplify three different non-stationary signals: a signal with an ascending change in beta value over time in red; in orange, a signal showing a change in SD value over time, and in green a signal with seasonal behavior, i.e., a sine like behavior.

9. *STL Decomposition / Trend analysis: Seasonal and Trend using Loess decomposition* 188

(STL) was used to reduce noise (30). This mathematical method allows the splitting of 189

the CpG signal over time into three components: trend, seasonal and a remainder (noise) 190

component. The average methylation curve between 20 to 80 years before and after STL 191

process can be seen for probes cg03037684 and cg16803083 mapped to ESR1 gene and 192

to a region that was not annotated, respectively in figure 3B and C, and in figure 3 F and 193

G, respectively. 194

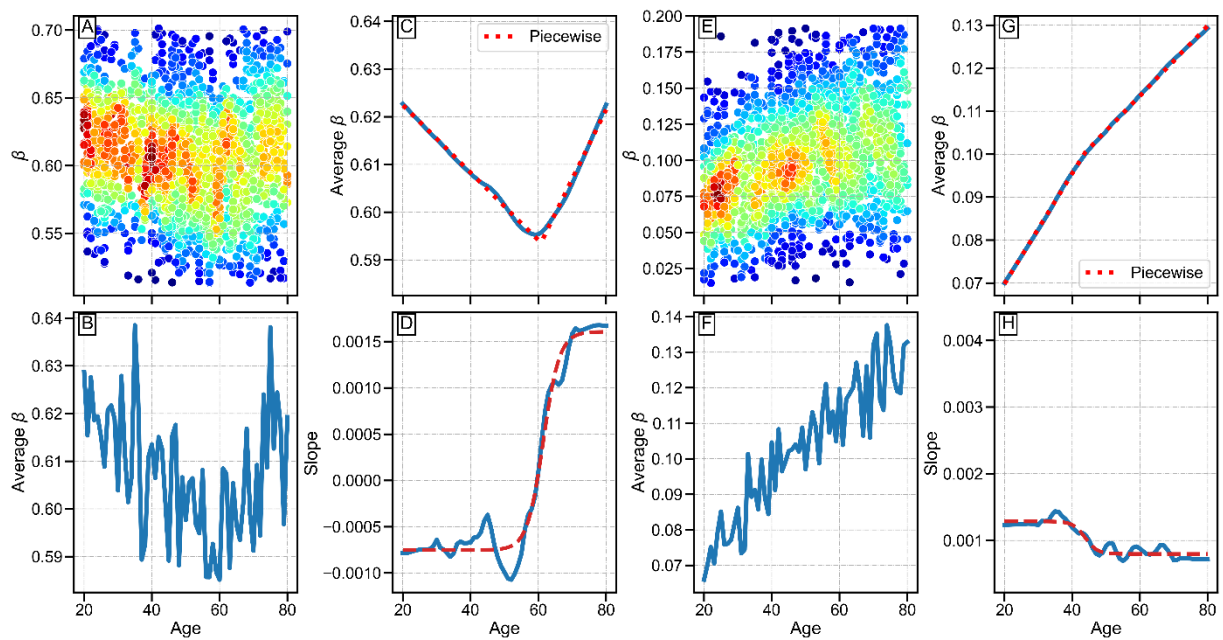

195

**Figure 3:** Mean change in  $\beta$  values of two CpG sites between the ages of 20 to 80 years. A- 196

D and E-H represent 2 CpG sites with a change in mean methylation fraction with age, one 197

with (cg03037684; mapped to ESR1; curvilinear change) and the other without an ESP 198

(cg16803083; linear change), respectively. (A, E) the original data of the  $\beta$  values of 2143 199

individuals between 20 to 80 years old, (B, F) Average  $\beta$  values of all individuals (presented 200

in A, E, respectively) at the same age with one year resolution, (C, G) An STL analysis of 201

the average values presented in B and F (blue line), a piecewise model fitting to the STL 202

data is presented as two linear red dashed lines, and (D, H) The first derivative of the 203

averaged data following SLT, yields a sigmoid shape curve in D and a close to horizontal 204

shaped curve in H (blue lines). The dashed red line shows the close fitting of a sigmoid to  
the STL average data. Color code in A and E is for the density of the number of individuals  
for each beta value and for each age (per one year interval; red for most dense and blue for  
list dense).

10. *Switch point analysis-Piecewise Regression & Sigmoid fitting*: The previous filtering  
eliminated CpG sites showing no significant change with age. We next identified CpG  
sites with ESP, i.e., CpG sites having a definable behavior until a certain age, but  
showing a change in behavior as of a specific age and on as demonstrated in figure 3A-D.  
To this aim we combined two methods which generated parameters for the construction  
of an artificial model that we subsequently used for the identification and selection of  
ESPs.

A. *Piecewise regression analysis*, which is based on fitting two linear curves to the  
average methylation values at each year of age between 20 to 80 years (red dashed  
lines in figure 3C and 3G) as formulated in equation 1, where  $(\alpha_1, \alpha_2, \beta_1, \beta_2)$  are the  
intercepts and slopes of each of the linear curve, respectively, calculated based on the  
least squares, and  $S_p$  is the switch point.

*Equation 1:*

$$Piecewise(age_i) = \begin{cases} \alpha_1 + \beta_1 * (age_i - 20), 20 < age_i \leq S_p \\ \alpha_2 + \beta_2 * (age_i - S_p), S_p < age_i \leq 80 \end{cases}$$

The age of switch point is where the two fitted linear curves meet.

B. *Sigmoid fitting analysis*, which is based on fitting a sigmoid curve to the first  
derivative of the average  $\beta$  values, between 20 to 80 years, with 1 year intervals for

each of our non- stationary CpGs sites. In Figure 3D and 3H the first derivatives of 229  
average  $\beta$  values are presented as blue lines and the fitting to a sigmoid as dashed red 230  
lines, as described in equation 2, where  $x$  is the age,  $\lambda$  the middle of the sigmoid and 231  
S,B, and K are scaling parameters (supplementary file S1). 232

$$\text{Equation 2: } F(x) = \frac{S}{(1+e^{-K*(x-\lambda)})+B} \quad 234$$

The least squares method was used to calculate the optimal parameters (S, B, K,  $\lambda$ ). 235  
The age of SP, then, is the inflection point of the sigmoid curve (indicated by the 236  
vertical grey dashed arrow in Figure 3D). 237  
238

The piecewise analysis provides a very ideal behavior of a particular time point where the 239  
linearity of a beta values of a CpG site changes. Mathematically it is equivalent to a single 240  
point in which the slope changes and can be defined as discontinuous for its first derivative 241  
(Figure 4A). In population studies, a switch point will not be seen insentiently at a certain 242  
age but will rather take place gradually over several years. Therefore, a sigmoid curve, 243  
fitted to the first derivative of our non- stationary, STL-processed average  $\beta$  values between 244  
20 to 80 years, may better describe the gradual emergence of a SP, as illustrated in figure 245  
4B). According to this analysis, the behavior of ESPs can be also characterized by a 246  
bilinear course having the first slope of methylation loss/ gain rate up to a certain age range 247  
and a second different slope from that age range onwards, as described in figure 3C. This 248  
is depicted by the two green arrows, where the vertical green lines denote the start and the 249  
end of an ESP period. 250  
251

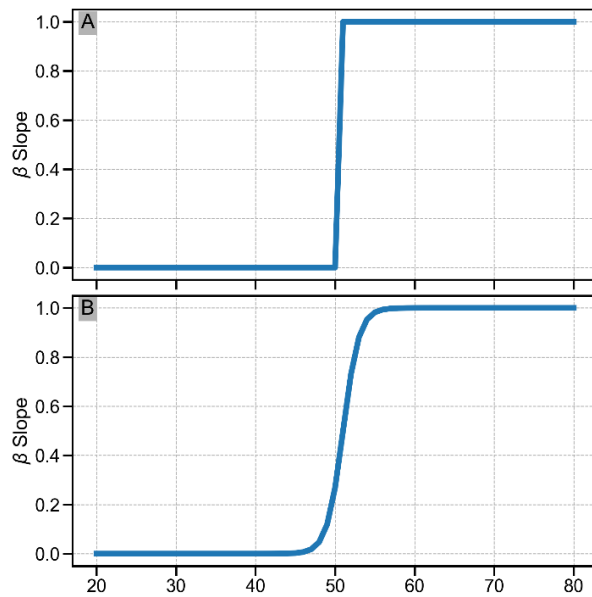

**Figure 4:** illustration of the first derivative of  $\beta$  values of a SP CpG site from 20 to 80 years. (A) an instantaneous SP, (B) a gradual, more realistic SP.

11. *Artificial model for the identification of switch points:* To filter out poor quality and/or noisy

probes, we constructed a mathematical model resulting in a collection of parameters which were used to distinguish between valid and non-valid SP CpGs. The model was based on an in person, CpG by CpG, visual inspection of randomly selected 1500 CpG sites and their features (as detailed below) out of the entire non-stationary 69,275 CpG sites population. During this procedure each screened CpG was labelled as having/not having a SP. ESP sites were identified as such only if any of the following exclusion criteria was present: a) the first derivative of the curve of the average  $\beta$  values as a function of age, did not fit a sigmoid curve, as indicated, for example, by the horizontal, first derivative curve derived from a linear methylation gain with age (figure 3H); b) derived STL was incompatible with the original data curve, c) the STL suggested the existence of a SP, but the actual curve could be fitted into an alternative pattern; d) a SP point generated by an abrupt and large change in beta values, which is likely fortuitous secondary to technicalities as may be suggested from the illustration in figure 4A. The piecewise regression and sigmoid models were used to derive 19 parameters (table 2S in supplementary). Based on in person visual inspection of the 1500 CpG sites, a decision

tree model was trained and evaluated with an average F1 Score of 0.89 on 5 fold cross 277  
validation. The decision tree model was then used to examine all 69,275 non-stationary 278  
probes in order to distinguish valid ESP probes from invalid probes. Eventually, 5175 279  
probes that passed this filtration process were identified as ESPs. 280

281

### **Pathway enrichment analysis for ESP genes**

282

Kyoto Encyclopedia of Genes and Genomes (KEGG) enrichment analysis (31) was performed 283  
using DAVID (32) based on the 2,813 genes mapped to the 5175 ESPs. Pathways with 284  
Benjamini  $< 0.05$  were considered as significantly enriched. 285

### **Presence of ESP in genes associated with aging and longevity**

286

We compiled a list of aging and longevity genes by assembling genes from four databases that 287  
are gathered in The Human Ageing Genomic Resources 288  
(HAGR) <https://genomics.senescence.info/> (33): 1) GenAge: Database of Aging-Related 289  
Genes, which includes a curated database of over 300 genes related to human aging and a 290  
database of over 2000 aging- and longevity-associated genes in model organisms (34,35), 2) 291  
GenDR: Database of Dietary Restriction-Related Genes based on genetic manipulation 292  
experiments and gene expression profiling (36,37), 3) LongevityMap: a database of human 293  
genetic variants associated with longevity of over 2000 genes, some were found to be essential 294  
and some had no relation to longevity, 4) CellAge: Database of Cell Senescence Genes (38). 295  
Only genes that were found in either human, mouse or human cultured cells, were included in 296  
our list. From the LongevityMap database, we only included the genes that were found 297  
essential to longevity and deleted the non-essential ones. Finally, we deleted duplications and 298  
came up with a list of 973 resource genes related to aging and longevity. Venny 2.0.2 (39) 299  
was used to check for common ESP genes and aging/ longevity related genes. 300

**Results** 301

**Stationary vs. non-stationary CpG sites: change in DNA methylation level in relation** 302

**to age and the identification of CpG sites with an ESP behavior** 303

We analyzed the trends of the average methylation level ( $\beta$  values), calculated for each year 304  
of age at each age point, from the age of 20 to the age of 80 years and found that the vast 305  
majority of the ~340K CpG sites (n=341,247), eventually available for analysis, were 306  
stationary whereas 69,275 were found to be "non- stationary" (Materials and methods). We 307  
next examined the behavior of the non-stationary probe population and selected these with a 308  
clear ESP. The age of ESPs was the time at which acceleration/deceleration of DNA 309  
methylation gain/ loss rate occurred or the time at which a constant loss/ gain changed to a 310  
constant gain/ loss in methylation, respectably. In all, we identified a total of 5175 ESPs, of 311  
which 5113 were present in men and 4067 for women. Most were common for both sexes 312  
(supplementary file 2). 313

**ESP patterns** 315

DNA methylation trends with ESPs over the age range of 20 to 80 years appeared at several 316  
different patterns. First, the overall trend of methylation change either rose or declined with 317  
age (green arrows in the positive and negative overall trends in figure 5A). The overall trend 318  
in the fraction of methylation for each of these CpGs followed one of five sub- SP patterns, 319  
based on the relative relation between the first and second slopes of methylation change rate, 320  
before and after the ESP period (figure 5A). There were more ESPs with an overall positive 321  
methylation than negative methylation trend, especially in men. Pattern III, characterized by 322  
a decrease in methylation up to a certain age followed by an increase in methylation from the 323  
age period of ESP onwards, was the most dominant ESP pattern for both men and women, in 324

both overall trends (2465 and 1290 for positive and negative overall trends, respectively out 325  
of 5113 men ESPs and 2168 and 1676 for positive and negative overall trends, respectively, 326  
out of 4067 women ESPs). A sizable number of 1002 ESPs, showed acceleration in DNA 327  
methylation increase rate with age (pattern V), and this was seen exclusively in men. 328

329

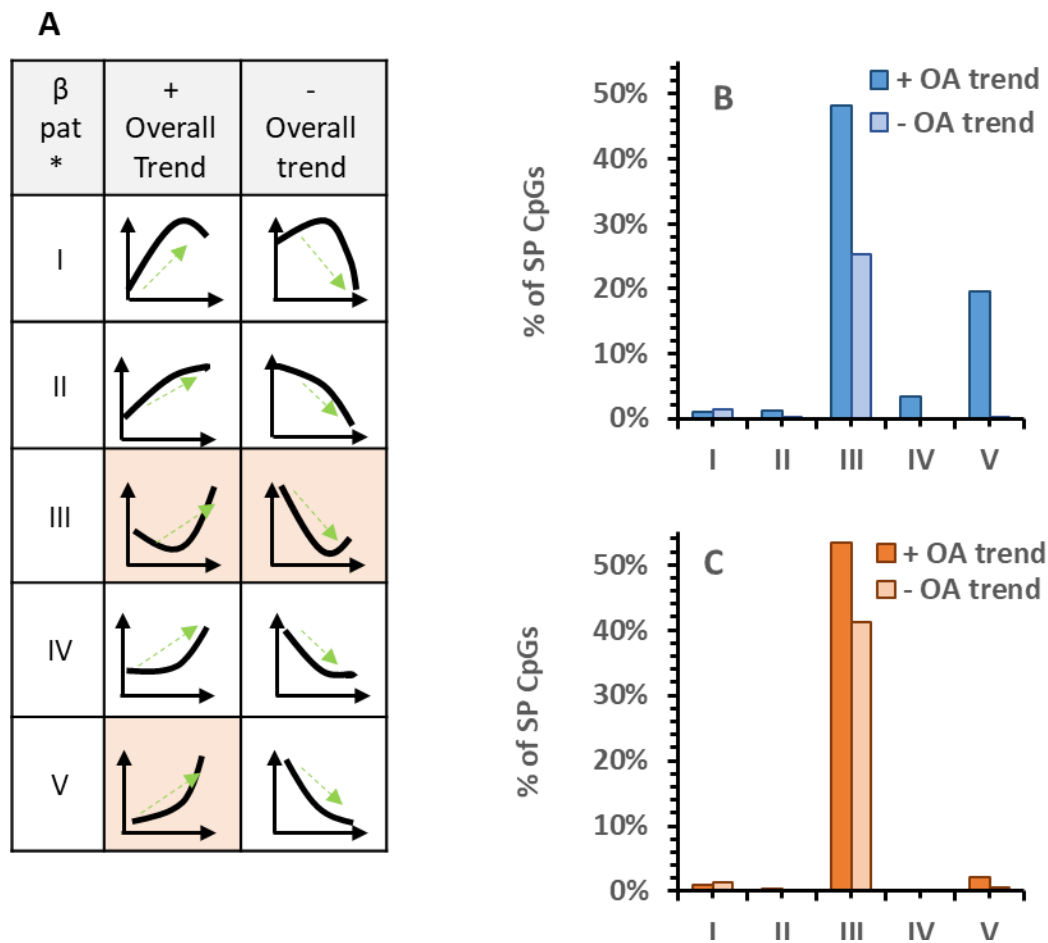

Figure 5: (A) a schematic view of the possible methylation SP patterns with age, for positive 330  
(+) and negative (-) overall trends (OA). Shown is the frequency of the different SP patterns 331  
in men (blue) (B) and women (orange) (C). SP CpG sites, for both positive and negative 332  
overall trends (green arrows in A), where 100% is the total SP CpG sites for each gender. 333

There was a relative even distribution of the mean beta value of the CpG probes with ESPs 334  
between 0.3 to 1, in CpGs with both negative and positive overall slop, for both men and 335



women (supplementary file 1, figure S2). This is in complete contrast to a typical beta value 336  
distribution of the total 450K probes presenting CpGs in which most of the probes have either 337  
a beta value close to 0.2 or to 0.9 (28). This means that compared to the total CpGs population, 338  
a higher fraction ESPs have beta values around 0.5, which may imply a more dynamic 339  
behavior between the methylated and de- methylated state. It is also possible that more ESPs 340  
are mapped to imprinted genes. None of the CpGs resided on the X chromosome and hence, 341  
the higher beta values in probes with ESP are not due to x- inactivation. 342

### **The age at which the epigenetic waves occur: relation to sex** 343

Each ESP occurs at a definable age. Figure 6 demonstrates the frequencies of SP ages for all 344  
ESPs, separately for men and women (5113 and 4067 ESPs for men and women, respectively). 345  
The earliest and smallest (n=115, 98; M/F, respectively) wave of ESPs lays between the ages 346  
of 30 to 33 years for both genders. A second wave, which includes several hundred ESPs 347  
(n=765, 445; M/F, respectively) is seen between the ages of 45-51 years and 42-48 years for 348  
men and women, respectively. This ESP age period for women begins slightly earlier than 349  
that of men. Finally, the largest and dominant wave of SPs is discernible between the ages of 350  
54- 62 years and 60- 69 years in men and women (n=4234, 3524; M/F respectively), 351  
respectively. Hence, most SP tend to appear later in women than in men. Indeed, 2 out of the 352  
3 waves, and collectively, the vast majority of ESPs take place ~six years and end ~seven 353  
years later in women compared to men). 354

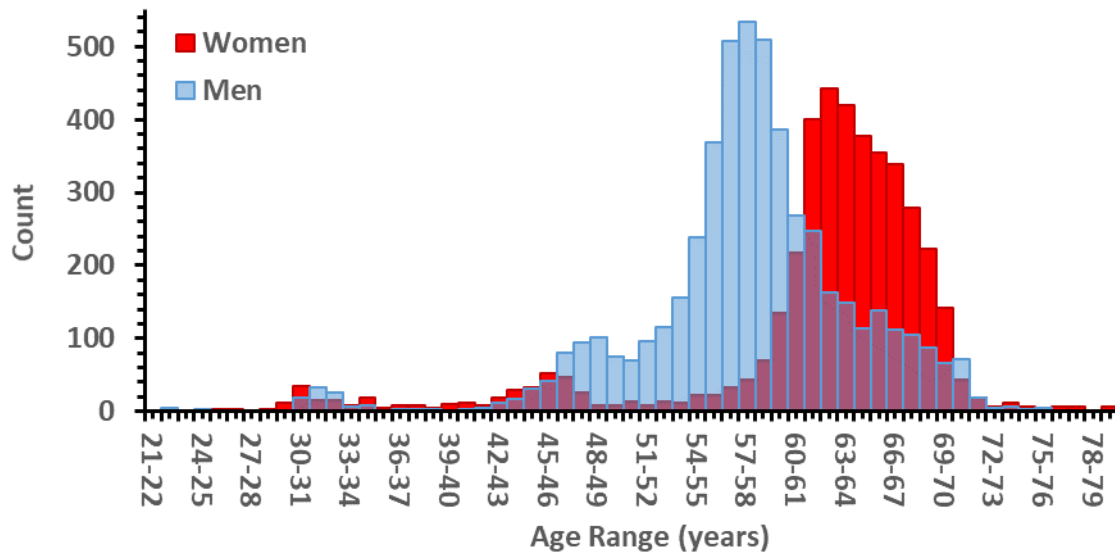

355

Figure 6: Sexual dimorphism in DNA methylation switch points as a function of age: Bimodal sex related distribution. The amount of CpGs with a switch point at a specific age, at 1 year intervals.

356

357

358

### Most SP CpG are common for women and men

359

Figure 7A is a Venn diagram showing that most ESPs are common for men and women (77.4%) while 21.4% ESPs are unique for men and only 1.5% are unique for women. We next constructed a Venn diagram for the 2,813 genes mapped to the ESPs (Figure 7B). In parallel to the ESPs, most genes with ESPs (81.4%) are common for men and women, 17.7% are unique for men and 0.9% are unique for women. This may imply that the aging process of men and women is mostly linked to similar biological pathways, with a clear difference in the age of onset. The full list of 5175 ESPs, their beta values, overall trends, first and second slopes (before and after the ESP period), age at the specific ESP, their mapped genes and their location in relation to their related gene, is listed in supplementary file S2. Since more than one CpG could be mapped for the same gene and since some CpGs were not mapped to a specific gene, the number of genes with ESPs is smaller than that of SP CpG sites.

360

361

362

363

364

365

366

367

368

369

370

371

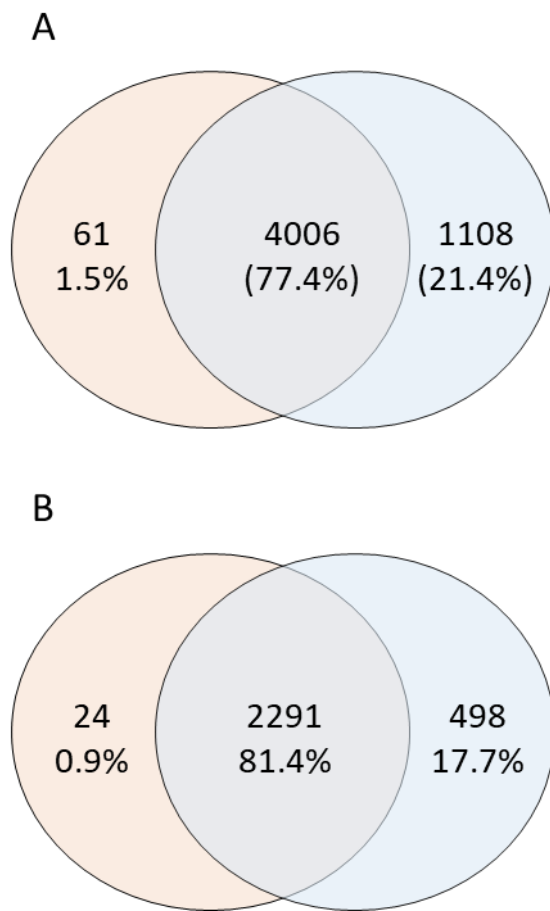

Figure 7: Venn diagram indicating the number of common and sex-specific ESPs (A) and genes related to the SP CpG sites (B) for men (blue) and women (Orange).

372

373

374

375

376

377

378

379

380

381

382

383

### **ESP gene enriched for defined biological pathways**

384

To examine the potential links of genes with ESP to aging, we conducted biological pathways enrichment analysis using the Kyoto Encyclopedia of Genes and Genomes (KEGG) pathway database. Fifty-nine pathways were enriched from the ESP gene list with a Benjamini threshold below 0.05 and a fold enrichment of around 2 (Supplementary file 2, Table S4). These pathways were predominantly related to the endocrine system (23%), cancer (13%), neurological communication (10%), cardiovascular system, immune system, cellular focal adhesions and additional pathways that serve multiple biological functions. Table 1 presents a sample of 9 pathways with prominent information regarding their relation to aging. The

385

386

387

388

389

390

391

392

complete list of age-related pathways which involve genes with ESPs, with the associated ESP 393

genes for each pathway can be found in Supplementary file 2, Table S4. 394

Table 1: Age related significantly enriched Kyoto Encyclopedia of Genes and Genomes 395

(KEGG) biological pathways in the SP genes list 396

| Pathway                                             | # of Genes | Fold Enr* | Benjamini | Age related changes                                                                                                                                                                                                                          |
|-----------------------------------------------------|------------|-----------|-----------|----------------------------------------------------------------------------------------------------------------------------------------------------------------------------------------------------------------------------------------------|
| hsa04261:<br>Adrenergic signaling in cardiomyocytes | 47         | 2.3       | 1.5E-05   | Decline in heart performance and myocardial remodeling ability; decrease in cardiomyocytes survival ability, which involves reduced response to adrenergic signaling                                                                         |
| hsa04360:<br>Axon guidance                          | 52         | 2.1       | 2.3E-05   | Dysregulation of axonal mRNA localization and local protein translation                                                                                                                                                                      |
| hsa04713:<br>Circadian entrainment                  | 32         | 2.4       | 1.3E-04   | Increasingly dysregulated with age; disruption of circadian entrainment accelerates aging                                                                                                                                                    |
| hsa04725:<br>Cholinergic synapse                    | 34         | 2.2       | 3.2E-04   | Cholinergic synapse function declines in the brain and neuromuscular junction.                                                                                                                                                               |
| hsa04611:<br>Platelet activation                    | 36         | 2.1       | 3.6E-04   | Increases with age → increased cardiovascular thromboembolic clinical and subclinical events; noncanonical platelet effects accelerate neurological diseases including Alzheimer's disease, possibly by increased secretion of beta-amyloid. |
| hsa04911:<br>Insulin secretion                      | 27         | 2.3       | 1.0E-03   | Aging beta cells display lower insulin secretory capacity in response to cellular and circulating cues                                                                                                                                       |

|                                           |    |     |         |                                                                                                                                                                                                                         |
|-------------------------------------------|----|-----|---------|-------------------------------------------------------------------------------------------------------------------------------------------------------------------------------------------------------------------------|
| hsa04915:<br>Estrogen signaling pathway   | 36 | 1.9 | 2.8E-03 | Beside traditional tissue targets for estrogens (bone and cardiovascular system), decline in estrogen activity unfavorably affect the preservation of brain connectivity, synapse structure and function                |
| hsa04930:<br>Type II diabetes mellitus    | 15 | 2.4 | 1.9E-02 | Aging is modulated by metabolic dysregulation of carbohydrate, fat and protein metabolism, overlapping with or culminating type 2 diabetes                                                                              |
| hsa04211:<br>Longevity regulating pathway | 22 | 1.8 | 4.4E-02 | Normal insulin response, caloric restriction, maintenance of autophagic flow and sufficient mitochondrial biogenesis and controlling inflammation and oxidative stress, improve survival and longevity and retard aging |

\*Fold enrichment; # = number

397

### **ESP Genes known to be associated with aging**

398

We next searched for recognized associations between aging or longevity with ESP genes.

399

We extracted ESP genes from known aging- related genes, which were derived from the

400

GenAge, GenDR, LongevityMap and CellAge databases compiled in The Human Ageing

401

Genomic Resources (HAGR) (33). Of these databases, we identified 149 genes with ESP (for

402

the full list see supplementary file S3, Table S5): 76 genes were from the GenAge, 37 from

403

CellAge, 33 from LongevityMap and 28 from GenDR. A number of genes appeared in more

404

than one database. Hence, 5.3% of all ESP genes were related to aging, not significantly

405

different from the fraction (4.9%) of ageing-related genes derived from these databases (973

406

genes) out of the total number of genes in the human genome (19,969 genes). While not

407

enriched, then, the list of aging/longevity related genes with ESPs includes a number of genes

408

whose relation to aging is of interest, which are compiled in Table 2. Among the multiple

409

genes with ESPs bearing a particularly significant impact on aging, some, such as ADCY5, 410  
APOB, adiponectin, FOXO3, IGF1R, mTORC2, and TXNIP are amongst the most 411  
extensively studied in this contest. The overall methylation trend with age, the mean  $\beta$  value 412  
and the ESP age of the prominent age- related genes in table 2 are presented for men. The full 413  
list of 149 ESP genes linked to aging and longevity with parameters for both genders is 414  
provided in tables S5-S7, supplementary file S3. The tables in the supplementary file includes, 415  
apart from the parameters presented in table 2, the ESP pattern for each gene and the delta 416  
between the first and second calculated slopes (before and after the ESP period). 417

Table 2: Prominent aging and longevity related genes associated with SP CpG sites 418

| SP-aging gene Symbol | SP- Aging genes                                      | UCSC probe | RefGene Group | Overall slope trend | $\beta$ | SP age |
|----------------------|------------------------------------------------------|------------|---------------|---------------------|---------|--------|
| ADCY5                | Adenylate Cyclase 5                                  | cg25661931 | 1stExon       | +                   | 0.97    | 61     |
| ADIPOQ               | Adiponectin, C1Q And Collagen Domain Containing      | cg10681525 | Body          | +                   | 0.71    | 55     |
| ADRA1B               | Adrenoceptor Alpha 1B                                | cg09444685 | Body          | -                   | 0.68    | 64     |
| AGER                 | Advanced Glycosylation End-Product Specific Receptor | cg10996463 | Body          | -                   | 0.87    | 43     |
|                      |                                                      | cg11105830 | Body          | +                   | 0.81    | 45     |
|                      |                                                      | cg18139800 | Body          | +                   | 0.92    | 58     |
| ALOX15B              | Arachidonate 15-Lipoxygenase Type B                  | cg15799267 | 5'UTR         | -                   | 0.34    | 55     |
| APOB                 | Apolipoprotein B                                     | cg13287979 | Body          | +                   | 0.83    | 55     |
|                      |                                                      | cg03350299 | TSS200        | +                   | 0.43    | 56     |
|                      |                                                      | cg25071744 | TSS200        | +                   | 0.52    | 57     |
|                      |                                                      | cg23949611 | Body          | -                   | 0.83    | 59     |
| ATG7                 | Autophagy Related 7                                  | cg01796438 | TSS1500       | +                   | 0.42    | 55     |
|                      |                                                      | cg11277834 | 5'UTR         | +                   | 0.69    | 61     |
| BCL2                 | BCL2 Apoptosis Regulator                             | cg08223235 | Body          | +                   | 0.31    | 57     |
| BNIP3                | BCL2 Interacting Protein 3                           | cg15390444 | Body          | +                   | 0.69    | 55     |
| CLDN1                | Claudin 1                                            | cg03601836 | Body          | -                   | 0.87    | 67     |
| CREBBP               | CREB Binding Protein                                 | cg04141008 | Body          | +                   | 0.72    | 55     |
| CSNK1E               | Casein Kinase 1 Epsilon                              | cg22494725 | Body          | -                   | 0.63    | 65     |
| DUSP1                | Dual Specificity Phosphatase 1                       | cg12333707 | TSS1500       | +                   | 0.50    | 60     |
| EGFR                 | Epidermal Growth Factor Receptor                     | cg05246100 | Body          | -                   | 0.72    | 59     |
|                      |                                                      | cg16488565 | Body          | +                   | 0.55    | 57     |
|                      |                                                      | cg16751451 | TSS1500       | +                   | 0.51    | 60     |

|       |                                                                  |            |         |   |      |    |
|-------|------------------------------------------------------------------|------------|---------|---|------|----|
| ERCC1 | ERCC Excision Repair 1,<br>Endonuclease Non-Catalytic<br>Subunit | cg23347323 | 3'UTR   | + | 0.73 | 55 |
| ESR1  | Estrogen Receptor 1                                              | cg03037684 | 3'UTR   | - | 0.61 | 58 |
| ETS1  | ETS Proto-Oncogene 1,<br>Transcription Factor                    | cg01900413 | Body    | + | 0.25 | 62 |
|       |                                                                  | cg25068347 | Body    | + | 0.77 | 66 |
|       |                                                                  | cg21695395 | Body    | + | 0.60 | 67 |
| ETS2  | ETS Proto-Oncogene 2,<br>Transcription Factor                    | cg15892280 | 5'UTR   | - | 0.43 | 55 |
| FOXO3 | Forkhead Box O3                                                  | cg08792630 | Body    | + | 0.37 | 63 |
| HDAC4 | Histone Deacetylase 4                                            | cg14653043 | Body    | + | 0.93 | 48 |
|       |                                                                  | cg24401044 | Body    | - | 0.97 | 51 |
|       |                                                                  | cg01771737 | Body    | - | 0.79 | 52 |
|       |                                                                  | cg04438064 | Body    | - | 0.49 | 53 |
|       |                                                                  | cg05758467 | Body    | + | 0.45 | 57 |
|       |                                                                  | cg15002163 | Body    | + | 0.61 | 61 |
|       |                                                                  | cg11550064 | Body    | + | 0.61 | 62 |
| HIPK2 | Homeodomain Interacting<br>Protein Kinase 2                      | cg03520802 | Body    | - | 0.54 | 53 |
|       |                                                                  | cg00995324 | Body    | + | 0.92 | 61 |
|       |                                                                  | cg23646343 | Body    | + | 0.25 | 68 |
| HK3   | Hexokinase 3                                                     | cg19791262 | TSS1500 | + | 0.73 | 51 |
|       |                                                                  | cg14709481 | 5'UTR   | + | 0.68 | 56 |
| IGF1R | Insulin Like Growth Factor 1<br>Receptor                         | cg08920032 | Body    | - | 0.49 | 58 |
| IGF2R | Insulin Like Growth Factor 2<br>Receptor                         | cg21774926 | TSS1500 | + | 0.37 | 59 |



|        |                                              |            |         |   |      |    |
|--------|----------------------------------------------|------------|---------|---|------|----|
| IGFBP2 | Insulin Like Growth Factor Binding Protein 2 | cg20366479 | Body    | + | 0.56 | 44 |
| INSR   | Insulin Receptor                             | cg23075968 | Body    | + | 0.39 | 61 |
| MGST1  | Microsomal Glutathione S-Transferase 1       | cg22494907 | 5'UTR   | - | 0.91 | 61 |
| MTOR   | Mechanistic Target Of Rapamycin Kinase       | cg10315903 | TSS1500 | + | 0.65 | 62 |
| NCOR2  | Nuclear Receptor Corepressor 2               | cg13146040 | 5'UTR   | + | 0.88 | 46 |
|        |                                              | cg03821418 | Body    | + | 0.54 | 52 |
|        |                                              | cg07241090 | Body    | + | 0.35 | 56 |
|        |                                              | cg22820108 | 5'UTR   | - | 0.40 | 57 |
|        |                                              | cg17825194 | Body    | - | 0.34 | 57 |
|        |                                              | cg22700848 | 5'UTR   | + | 0.38 | 58 |
|        |                                              | cg17187521 | 5'UTR   | + | 0.40 | 60 |
|        |                                              | cg17387577 | Body    | + | 0.33 | 69 |
| NEIL1  | Nei Like DNA Glycosylase 1                   | cg02426940 | Body    | + | 0.82 | 56 |
| NEK6   | NIMA Related Kinase 6                        | cg13958199 | TSS1500 | + | 0.61 | 53 |
|        |                                              | cg14082739 | 5'UTR   | + | 0.84 | 49 |
| NFE2L1 | NFE2 Like BZIP Transcription Factor 1        | cg27568306 | Body    | + | 0.91 | 53 |
| NGF    | Nerve Growth Factor                          | cg17750109 | 5'UTR   | - | 0.80 | 49 |
|        |                                              | cg02987481 | TSS1500 | + | 0.43 | 59 |
| NOS1   | Nitric Oxide Synthase 1                      | cg21006686 | TSS1500 | + | 0.70 | 57 |
|        |                                              | cg02500231 | 5'UTR   | + | 0.25 | 71 |
| NOS3   | Nitric Oxide Synthase 3                      | cg00571021 | Body    | - | 0.00 | 0  |
| NOTCH3 | Notch Receptor 3                             | cg08529654 | Body    | + | 0.41 | 60 |
| PAX4   | Paired Box 4                                 | cg11975652 | 3'UTR   | + | 0.68 | 49 |

|          |                                               |            |         |   |      |    |
|----------|-----------------------------------------------|------------|---------|---|------|----|
| PIK3CD   | Phosphatidylinositol-4,5-                     | cg23251761 | 5'UTR   | - | 0.73 | 49 |
|          | Bisphosphate 3-Kinase Catalytic Subunit Delta | cg19267205 | Body    | + | 0.41 | 56 |
| SLC6A6   | Solute Carrier Family 6 Member 6              | cg07573937 | 5'UTR   | - | 0.51 | 31 |
| SLC9A3R2 | SLC9A3 Regulator 2                            | cg09462956 | Body    | + | 0.56 | 56 |
| TNFSF13  | TNF Superfamily Member 13                     | cg13358186 | 5'UTR   | - | 0.00 | 0  |
| TP53     | Tumor Protein P53                             | cg07760161 | 5'UTR   | + | 0.67 | 61 |
| TXNIP    | Thioredoxin Interacting Protein               | cg19389852 | 1stExon | + | 0.46 | 60 |
| VWF      | Transmembrane Protein 270                     | cg09117673 | TSS200  | - | 0.79 | 55 |
| WT1      | WW And C2 Domain Containing 1                 | cg15946571 | Body    | + | 0.94 | 59 |

419

### **Key epigenetic regulators are ESP Genes**

420

Interestingly, we found that key regulators of DNA methylation have ESPs at related CpG sites (Table 3, and supplementary file 3, Table S6), of which the most prominent ones are listed in Table 3. The earliest mean age of appearance of ESP is seen for TRDMT1 and DNMT1 (47, 49 years, respectively), and the latest age of EPS is notable for TET2 (71 years).

421

422

423

424

**Table 3: Key SP genes involved in de/methylation processes**

425

| SP- Epigenetic gene Symbol | SP- Epigenetic gene name         | Probe      | UCSC RefGene Group | Overall slope | Mean $\beta$ | SP age |
|----------------------------|----------------------------------|------------|--------------------|---------------|--------------|--------|
| TET3                       | Tet Methylcytosine Dioxygenase 3 | cg15827185 | Body               | +             | 0.90         | 60     |

|        |                                           |            |       |   |      |    |
|--------|-------------------------------------------|------------|-------|---|------|----|
| TET2   | Tet Methylcytosine<br>Dioxygenase 2       | cg12306086 | 5'UTR | + | 0.36 | 71 |
| DNMT1  | DNA Methyltransferase 1                   | cg23662947 | Body  | + | 0.97 | 49 |
| DNMT3B | DNA Methyltransferase 3 Beta              | cg09835408 | 5'UTR | + | 0.35 | 56 |
| TRDMT1 | TRNA Aspartic Acid<br>Methyltransferase 1 | cg23661704 | Body  | + | 0.98 | 47 |

426

### **Estrogenic and androgenic SP genes**

427

Because most EPS begin to cluster during the fifth decade of life, in which women experience 428  
menopausal transition and hormonal changes begin to afflict men as well, and since the 429  
findings in Table 1 show that genes with ESPs are enriched with genes which participate in 430  
the estrogen signaling pathway, we queried our ESP gene list regarding the presence and 431  
potential enrichment with estrogen and androgen related genes. We found 24 genes that are 432  
involved in estrogenic signalling pathway: 14 (of 2813 SP genes) are specifically involved in 433  
estrogen receptor alpha (ESR1) signalling. The number of genes related estrogen receptor 434  
alpha signalling in the entire 19,969 human gene population, is 55. We calculated an 435  
enrichment Chi Square P value of 3.2e-08 and a binomial probability of 0.02 for randomly 436  
getting 14 or more genes related to estrogen receptor alpha when taking a sample of 2813 437  
genes. This indicates that there is an enrichment of estrogen receptor alpha- related signalling 438  
genes in our ESP list with 1.8fold enrichment. Additionally, we found 28 genes linked to 439  
androgen related pathways. 440

441

442

443

## **Discussion**

444

In the present study we set out to assess the relation between age and DNA methylation level 445  
in over 2000 subjects collected from 24 different cohorts, whose age spanned from 20 to 80 446  
years. On the average, more than 80% of the CpG sites screened by the Illumina 450K 447  
platform which then passed our internal data validation process were found to be stationary 448  
over the years. Stationarity does not exclude the possibility of significant intra-individual 449  
changes over the years in stationary probes, as the analyzed data is cross-sectional and not 450  
based on longitudinal analysis with repeated measurement of methylation of the same probes 451  
in the same subjects. Rather, our observations suggest that the majority of the probes included 452  
in the 450 k Illumina platform show a stable average methylation fraction between the ages 453  
of 20 to 80 years in apparently healthy subjects collected from heterogenous GSE sources. 454

About one fifth of the validated CpG sites probed in the 450K Illumina platform 455  
(69275/341247) were not stationary: they underwent, on the average, consistent changes in 456  
methylation level over time that can be described as linear/close to linear, curvilinear or 457  
displaying changes in the standard deviation of the mean beta values (methylation fraction). 458  
Among the latter group, 5175 non-stationary CpG sites changed linearly or in a manner close 459  
to linearity over a certain age span, but then changed course at/around certain age zones, thus 460  
displaying a switch point in their trend over the ages of 20-80 years, which we termed an 461  
epigenetic switch point (EPS). 462

In general, switch points detected in the non-stationary probes can be characterized as follows: 463

1) they are limited to a fraction of the known genes, 2813 of the ~20,000 human genes. 2) 464  
they appear in clusters as three apparent age-related waves: a small wave afflicting ~100 CpG 465  
sites as of the age of 30 to the age of ~34; a second wave between the ages of 40 to 50 years, 466  
composed of ~750 CpG sites which ends 3-4 years earlier in men; and a large wave, including 467

~4500CpG sites, between the ages of 50-68 years. 3) their distribution across each of waves 468  
grossly follows a normal Gaussian pattern. 4)~80% of the CpG sites with switch points are 469  
shared by women and men; 5) still, there is sexual dimorphism in the distribution of the switch 470  
points, such that most of them emerge, peak, decline and vanish earlier in men than in women. 471  
Further, in males ~20% of the ESPs are "male-only" CpGs, compared to only 1.5% "female 472  
only" ESPs. Concordantly, switch points occur in less CpG sites and genes in women than 473  
in men . Lastly, only men show ESPs with acceleration of an increasing trend in the fraction 474  
methylation beyond the ESP-specific age (pattern V, Figure 5). 475

The clustering of ESPs in defined CpG sites of a limited number of genes, at defined age zones 476  
with sexual dimorphism suggests some form of organization rather than a random occurrence. 477  
Random switch points would have displayed a spotty pattern spread all over the platform's 478  
probe population, with no predilection for CpG sites, genes, age or sex parameters. 479

What drives the appearance of EPS clusters in successive waves between the ages of 40-70 480  
years? Could these waves be somehow related to aging-related processes, even though they 481  
begin to decline rather sharply as of the late fifties in men and early sixties in women and then 482  
entirely fade just a few years later and do not continue to appear in the eight's decade of life? 483  
Certainly, our data cannot provide a fact-based elucidation of this question. However, one 484  
cannot escape the consideration of several physiological and clinical changes that precede, 485  
succeed or coincide with these waves in contemporary human life: hormonal and metabolic 486  
changes and the emergence of cardiovascular morbidities tend to cluster as of the age of 40. 487  
In females, menopause does not normally take place until 5 years following the initiation of 488  
the second wave, but the menopausal transition is a gradual process lasting 7 up to 14 years, 489  
most of which take place before the actual cessation of menses (40). Notably, the list of genes 490  
with ESP is enriched with ESR1 (estrogen receptor  $\alpha$ )-related genes Further, acceleration in 491

metabolic and cardiovascular disease in women actually takes place in post-menopausal 492  
women (41,42). Interestingly, ESP in estrogen/estrogen action related genes are nearly all 493  
shared by men and women (supplementary file S3, Table S7). 494

In men, testosterone declines by 0.8% annually as of the age of (43). The decline is much 495  
steeper when health status undergoes unfavorable but common impairments (44) with the 496  
appearance of overweight, obesity, diabetes and hypertension and cardiovascular events, all 497  
of which are on the rise in midlife, particularly after the age of 40 years (40–47). The latter 498  
conditions become significant players in females' health, on the average, about a decade later. 499  
Table 1 lists some of the biological pathways that are most strongly enriched with ESPs, in 500  
terms of statistical strength (Benjamini's test with  $p=0.04-0.00015$ ) and involve processes 501  
which are inseparable from the same health trends observed in and as of the fifth decade of 502  
life. As examples, we find enrichment with CpG sites with SP in genes linked to adrenergic 503  
signaling (hypertension, cardiovascular disease), circadian rhythmicity, cholinergic synapse 504  
(obesity, aging, metabolic syndrome), platelet activation (cardiovascular events), insulin 505  
secretion (overweight, obesity, diabetes), type II diabetes mellitus and estrogen signaling 506  
(menopausal transition). 507

A close look at the list of genes showing ESPs discloses several examples CpG's/genes/groups 508  
which are of interest vis-à-vis switch points and /or aging. Histone deacetylase 4 (HDAC4) 509  
has 7 CpG sites with ESP (Table 2) and interestingly, estrogen act to retain HDAC4 in the 510  
nucleus and thus inhibit hypertrophic gene expression and cardiac hypertrophy (48), a 511  
common phenotypic phenomenon of heart aging (49). cg15799267, located on the enhancer 512  
of arachidonate 15-lipoxygenase B, an enzyme implicated in atherosclerosis (50,51), has an 513  
ESP at the age of 45 in women and 54 in men, after which it is increasingly demethylated with 514  
age (Table 5S, supplement file 3S). 515

The presence of ESPs on some of the aging/longevity genes is also intriguing. For example, 516  
KO of adenylate cyclase 5 (ADCY5), which involves many G-protein coupled receptor 517  
signaling, such as the beta-adrenergic receptor signaling, increased the median life span of 518  
mice by 30% (52). Not only was lifespan increased, but resistance to cardiac stress rose 519  
whereas age- induced cardiomyopathy and reduction in bone density were lessened (52–54). 520  
The co-presence of ESPs in the EGFR (epidermal factor receptor), insulin receptor, IGF1R, 521  
IG2R, is also notable, as these are network players at the interface of growth control (including 522  
cancer growth) and vascular aging with metabolic carbohydrate, fat and protein homeostasis, 523  
where both excess activity or improper activation can modulate metabolic disease, bridge 524  
insulin resistance to cancer and thus affect survival (55–58). Disruption of the insulin/insulin- 525  
like growth factor 1 signaling (IIS) pathway in *Caenorhabditis elegans* was found to double 526  
its lifespan (59). At the organ level, IGF1R KO in mice cardiomyocytes attenuates cardiac 527  
hypertrophy associated with cardiac aging (60) whereas constitutive activation of IGF1R in 528  
vascular smooth muscle cells of old mice accelerates the development of atherosclerosis (61). 529  
The IR/IGF-1 signaling cascade also negatively regulates Forkhead Box O3 (FOXO3), a 530  
transcription factor with a strong positive impact on aging and age-related phenotypes, 531  
operating through enhancement of cellular ability to sustain stress (62). Concordant with this 532  
role of FOXO3, natural SNPs in the FOXO3 gene were associated with increased longevity 533  
of American men of Japanese ancestry aged  $\geq 95$  years (61,62). 534

The Mechanistic Target of Rapamycin Kinase (mTOR) is tightly linked to aging biology (65– 535  
68). It functions as an intracellular energy sensor and a central regulator of growth, 536  
proliferation, metabolism, survival, protein synthesis, apoptosis autophagy and transcription 537  
(69). Impressively, rapamycin, an inhibitor of the mTOR complex 1 (mTORC1) has thus far 538  
increased lifespan in all model organisms studied (65). The protein complex mTOR2 539  
promotes the activation of insulin receptors and insulin-like growth factor 1 receptors and as 540

such, disruption of mTORC2 leads to glucose intolerance, diabetes, lower activity level and 541  
immunosuppression (66,70). Its activity is inhibited by insulin/insulin-like growth factor 542  
(IGF-1) signaling (IIS) cascade stimulation. Finally, differential methylation in CpG sites 543  
related to Thioredoxin Interacting Protein (TXNIP), shown here to have ESPs, were found in 544  
Type 2 Diabetes population, commonly, associated with aging (71–73). 545

Table 3 highlights 5 ESPs on genes encoding enzymes which directly affect DNA 546  
methylation. DNMT1, DNMT3B are classical writer enzymes responsible for DNA 547  
methylations. DNMT1, catalyzes the transfer of a methyl group to a cytosine nucleotide and 548  
is mainly responsible for maintaining DNA methylation, which ensures the fidelity of this 549  
epigenetic patterns across cell divisions. In contrast, DNA Methyltransferase 3 Beta 550  
(DNMT3B) functions in *de novo* methylation. Hence, a change at the ESP for DNMT3B at a 551  
mean age of 56 may be consequential. TRDMT1, tRNA aspartic acid methyltransferase 1, 552  
also known as DNMT2, can also act as a writer, but is importantly linked to resistance to 553  
stress, including oxidative stress, inflammation, salt stress, and cellular senescence (74,75). 554  
TET enzymes generally function as 5-mC erasers by the conversion of 5-mC into 5-hmC, an 555  
intermediary metabolite that releases the presumed effect of the methylated CpG site. Notably, 556  
2 of the three known TET enzymes, TET3 and TET2 are shown to possess ESP age of 71 and 557  
60 years, respectively. Hence, some ESPs can be identified in the DNA 558  
methylation/demethylation machinery itself, preceding or coinciding with the overall ESPs 559  
waves (Table 3). 560

Because these are just few of the >2800 genes with SP, and since ESPs waves encompass a 561  
distinct, but broad age ranges, a detailed analysis of the of potential specific potential links 562  
between the unfolding clinical unfolding of physiological processes and common diseases in 563  
evolution and the epigenetic waves and their individual components comprises a formidable 564  
challenge for future work . 565



At the present phase, the conceptualization of the ESPs waves as a potentially significant 566  
phenomenon, requires consideration of the fact that whereas aging itself, including epigenetic 567  
aging (5–7,14) goes on continuously with advancing years, the ESPs waves apparently begin 568  
to wane after the age of ~58 in men and ~63 in women and then completely disappear within 569  
the following 5-8 years. This transient pattern of epigenetic waves might indicate that the CpG 570  
signals comprising the ESP waves are mechanistically involved in or at the least echo some 571  
biological resetting that permits aging to advance, but may also reflect compensatory pro- 572  
longevity biosystems activated by signals of aging and senescence. It is also possible, 573  
particularly since we analyze age by cross-sectional and not longitudinal tools, that the waning 574  
of the ESPs reflects a Darwinian selection, the survival of the fittest: subjects who remained 575  
alive to their 8th decade may have not experienced the switch point waves that afflicted non- 576  
survivors, thus leaving the 8th decade of life free of ESP waves. While potentially testable, 577  
these hypotheses cannot be addressed without in depth longitudinal studies . 578

In conclusion, this is the first report of epigenetic aging waves in the form of clustering of 579  
EPS in a fraction of the genes comprising the human genome, in an age and sex specific 580  
manner. The main weakness of this report is that it is based on cross sectional analysis of mean 581  
methylation level and not on longitudinal observations in the same individuals and therefore 582  
does not deal with intra-individual changes in DNA methylation. This novel phenomenon, 583  
however, which appears well organized and is linked to several transitional periods in human 584  
life, lays the foundations to future quests to understand its underlying triggers as well as health 585  
and aging-related consequences. 586

## **List of abbreviations**

 587

ESP: epigenetic switch points 588

|                                                                              |     |
|------------------------------------------------------------------------------|-----|
| HDAC4: Histone deacetylase 4                                                 | 590 |
| mTOR: Mechanistic Target of Rapamycin Kinase                                 | 591 |
| FOXO3: Forkhead Box O3                                                       | 592 |
| TXNIP: Thioredoxin Interacting Protein                                       | 593 |
| ADCY5: adenylate cyclase 5                                                   | 594 |
| IGFR: insulin growth factor receptor                                         | 595 |
| IGF: insulin growth factor                                                   | 596 |
| IIS: insulin/insulin-like growth factor (IGF-1) signaling                    | 597 |
| DNMT1: DNA methyl transferase 1                                              | 598 |
| TRDMT1: tRNA aspartic acid methyltransferase 1, also known as DNMT2,         | 599 |
| DNMT3B: Methyltransferase 3 Beta                                             | 600 |
| TET1/2: Ten-Eleven Translocation 1/2                                         | 601 |
| <b>Ethics approval and consent to participate</b>                            | 602 |
| Not applicable                                                               | 603 |
| <b>Consent for publication</b>                                               | 604 |
| Not applicable                                                               | 605 |
| <b>Availability of data and materials</b>                                    | 606 |
| The GEO number of the data sets analyzed during the current study are listed | 607 |
| in Additional file 1, table S1.                                              | 608 |
| <b>Competing interests</b>                                                   | 609 |

The authors declare that they have no competing interests 610

**Funding** 611

This research was funded by Sami and Tova Sagol 612

**Author contribution statement** 613

N.S. initiated the project. N.S., E.S., T.K and T.S. designed the study. T.K, E.S, T.S, Y.M, 614

and G.S have selected and filtered the data source. T.K and E.S did all the mathematical and 615

statistical calculations. Y.E and M.P gave useful reviews and comments on the paper. N.S, 616

E.S and T.S. wrote the manuscript. All authors gave approval to the final version of the 617

manuscript. 618

619

**Acknowledgment** 620

We would like to thank Sami and Tova Sagol for their generous donation to the Sagol 621

Epigenetic center, which made this study possible. 622

623

Supplementary material: 624

Supplementary file 1: table S1: The GEO number of the data sets analyzed during the current 625

study, table S2: the 19 parameters used in the decision tree model, figure S1: Age distribution 626

of the sample dataset by gender, figure S2: Distribution of  $\beta$  values in type III ESPs. 627

Supplementary file 2: Table 3: The complete list of 5175 ESP, Table 4: The complete list of 628

age-related pathways which involve genes with ESPs. 629

Supplementary file 3: Table 5: The complete list of 149 ESP genes which are aging/ longevity 630

genes. Table 6: DNA methylation process- related ESP. Table 7: Estrogen related ESP. Table 631

8: Androgen related ESP. 632

|                                                                                                                                                                                                                                                                                                                                                                                                                                                                             |                                 |
|-----------------------------------------------------------------------------------------------------------------------------------------------------------------------------------------------------------------------------------------------------------------------------------------------------------------------------------------------------------------------------------------------------------------------------------------------------------------------------|---------------------------------|
| <b><u>References:</u></b>                                                                                                                                                                                                                                                                                                                                                                                                                                                   | 633                             |
| 1. Mays-Hoopes LL. DNA Methylation in Aging and Cancer. <i>J Gerontol</i> [Internet]. 1989 Nov 1 [cited 2022 Sep 29];44(6):35–6. Available from: <a href="https://academic.oup.com/geronj/article/44/6/35/564452">https://academic.oup.com/geronj/article/44/6/35/564452</a>                                                                                                                                                                                                | 634<br>635<br>636               |
| 2. Jones MJ, Goodman SJ, Kobor MS. DNA methylation and healthy human aging. 2015 Dec 1 [cited 2021 Oct 4];14(6):924–32. Available from: <a href="https://pubmed.ncbi.nlm.nih.gov/25913071/">https://pubmed.ncbi.nlm.nih.gov/25913071/</a>                                                                                                                                                                                                                                   | 637<br>638<br>639               |
| 3. Drinkwater RD, Blake TJ, Morley AA, Turner DR. Human lymphocytes aged in vivo have reduced levels of methylation in transcriptionally active and inactive DNA. <i>Mutat Res</i> [Internet]. 1989 [cited 2022 Sep 30];219(1):29–37. Available from: <a href="https://pubmed.ncbi.nlm.nih.gov/2911269/">https://pubmed.ncbi.nlm.nih.gov/2911269/</a>                                                                                                                       | 640<br>641<br>642<br>643        |
| 4. Horvath S. DNA methylation age of human tissues and cell types. <i>Genome Biol</i> . 2013 Oct 21;14(10):R115.                                                                                                                                                                                                                                                                                                                                                            | 644<br>645                      |
| 5. Horvath S, Zhang Y, Langfelder P, Kahn RS, Boks MP, Eijk K van, et al. Aging effects on DNA methylation modules in human brain and blood tissue. <i>Genome Biol</i> [Internet]. 2012 [cited 2022 Sep 30];13(10):R97. Available from: <a href="https://www.academia.edu/11469305/Aging_effects_on_DNA_methylation_modules_in_human_brain_and_blood_tissue">https://www.academia.edu/11469305/Aging_effects_on_DNA_methylation_modules_in_human_brain_and_blood_tissue</a> | 646<br>647<br>648<br>649<br>650 |
| 6. Johansson Å, Enroth S, Gyllensten U. Continuous Aging of the Human DNA Methylome Throughout the Human Lifespan. <i>PLoS One</i> [Internet]. 2013 Jun 27 [cited 2022 Sep 29];8(6):e67378. Available from: <a href="https://journals.plos.org/plosone/article?id=10.1371/journal.pone.0067378">https://journals.plos.org/plosone/article?id=10.1371/journal.pone.0067378</a>                                                                                               | 651<br>652<br>653<br>654        |
| 7. Florath I, Butterbach K, Müller H, Bewerunge-hudler M, Brenner H. Cross-sectional and longitudinal changes in DNA methylation with age: an epigenome-wide analysis                                                                                                                                                                                                                                                                                                       | 655<br>656                      |

- revealing over 60 novel age-associated CpG sites. *Hum Mol Genet* [Internet]. 2014 657  
Mar [cited 2022 Sep 29];23(5):1186–201. Available from: 658  
<https://pubmed.ncbi.nlm.nih.gov/24163245/> 659
8. Illingworth RS, Bird AP. CpG islands--'a rough guide'. *FEBS Lett* [Internet]. 2009 660  
Jun 5 [cited 2022 Sep 29];583(11):1713–20. Available from: 661  
<https://pubmed.ncbi.nlm.nih.gov/19376112/> 662
9. Teschendorff AE, West J, Beck S. Age-associated epigenetic drift: implications, and a 663  
case of epigenetic thrift? *Hum Mol Genet* [Internet]. 2013 Oct [cited 2022 Sep 664  
29];22(R1). Available from: <https://pubmed.ncbi.nlm.nih.gov/23918660/> 665
10. Saxonov S, Berg P, Brutlag DL. A genome-wide analysis of CpG dinucleotides in the 666  
human genome distinguishes two distinct classes of promoters. *Proc Natl Acad Sci U 667  
S A* [Internet]. 2006 Jan 31 [cited 2022 Sep 29];103(5):1412–7. Available from: 668  
<https://www.pnas.org/doi/abs/10.1073/pnas.0510310103> 669
11. Hannum G, Guinney J, Zhao L, Zhang L, Hughes G, Sada SV, et al. Genome-wide 670  
Methylation Profiles Reveal Quantitative Views of Human Aging Rates. *Mol Cell 671  
[Internet]*. 2013 Jan 24 [cited 2021 Oct 4];49(2):359–67. Available from: 672  
<https://pubmed.ncbi.nlm.nih.gov/23177740/> 673
12. Weidner CI, Lin Q, Koch CM, Eisele L, Beier F, Ziegler P, et al. Aging of blood can 674  
be tracked by DNA methylation changes at just three CpG sites. *Genome Biol 675  
[Internet]*. 2014 Feb 3 [cited 2022 Sep 29];15(2):1–12. Available from: 676  
<https://genomebiology.biomedcentral.com/articles/10.1186/gb-2014-15-2-r24> 677
13. Mcclay JL, Aberg KA, Clark SL, Nerella S, Kumar G, Xie LY, et al. A methylome- 678  
wide study of aging using massively parallel sequencing of the methyl-CpG-enriched 679  
genomic fraction from blood in over 700 subjects. *Hum Mol Genet* [Internet]. 2014 680

- Mar [cited 2022 Sep 29];23(5):1175–85. Available from: 681  
<https://pubmed.ncbi.nlm.nih.gov/24135035/> 682
14. Shahal T, Segev E, Konstantinovsky T, Marcus Y, Shefer G, Pasmanik-Chor M, et al. 683  
Deconvolution of the epigenetic age discloses distinct inter-personal variability in 684  
epigenetic aging patterns. *Epigenetics and Chromatin* [Internet]. 2022 Dec 1 [cited 685  
2022 Sep 29];15(1):1–12. Available from: 686  
[https://epigeneticsandchromatin.biomedcentral.com/articles/10.1186/s13072-022- 687  
00441-y](https://epigeneticsandchromatin.biomedcentral.com/articles/10.1186/s13072-022-00441-y) 688
15. Chen BH, Marioni RE, Colicino E, Peters MJ, Ward-Caviness CK, Tsai PC, et al. 689  
DNA methylation-based measures of biological age: Meta-analysis predicting time to 690  
death. *Aging (Albany NY)* [Internet]. 2016 [cited 2022 Sep 29];8(9):1844–65. 691  
Available from: <https://pubmed.ncbi.nlm.nih.gov/27690265/> 692
16. Horvath S, Gurven M, Levine ME, Trumble BC, Kaplan H, Allayee H, et al. An 693  
epigenetic clock analysis of race/ethnicity, sex, and coronary heart disease. *Genome 694  
Biol* [Internet]. 2016 Aug 11 [cited 2021 Oct 4];17(1):171. Available from: 695  
[https://genomebiology.biomedcentral.com/articles/10.1186/s13059-016-1030-0 696](https://genomebiology.biomedcentral.com/articles/10.1186/s13059-016-1030-0)
17. Zhang Y, Wilson R, Heiss J, Breitling LP, Saum KU, Schöttker B, et al. DNA 697  
methylation signatures in peripheral blood strongly predict all-cause mortality. *Nat 698  
Commun.* 2017;8:14617. 699
18. Jain P, Binder AM, Chen B, Parada H, Gallo LC, Alcaraz J, et al. Analysis of 700  
Epigenetic Age Acceleration and Healthy Longevity Among Older US Women. 701  
*JAMA Netw Open* [Internet]. 2022 Jul 1 [cited 2022 Sep 29];5(7):e2223285– 702  
e2223285. Available from: 703  
[https://jamanetwork.com/journals/jamanetworkopen/fullarticle/2794706 704](https://jamanetwork.com/journals/jamanetworkopen/fullarticle/2794706)

19. Levine ME, Hosgood HD, Chen B, Absher D, Assimes T, Horvath S. DNA methylation age of blood predicts future onset of lung cancer in the women's health initiative. *Aging (Albany NY)* [Internet]. 2015 [cited 2022 Sep 29];7(9):690–700. Available from: <https://pubmed.ncbi.nlm.nih.gov/26411804/>
20. Ambatipudi S, Horvath S, Perrier F, Cuenin C, Hernandez-Vargas H, Le Calvez-Kelm F, et al. DNA methylome analysis identifies accelerated epigenetic ageing associated with postmenopausal breast cancer susceptibility. *Eur J Cancer* [Internet]. 2017 Apr 1 [cited 2022 Sep 29];75:299–307. Available from: <https://pubmed.ncbi.nlm.nih.gov/28259012/>
21. Roetker NS, Pankow JS, Bressler J, Morrison AC, Boerwinkle E. Prospective Study of Epigenetic Age Acceleration and Incidence of Cardiovascular Disease Outcomes in the ARIC Study (Atherosclerosis Risk in Communities). *Circ Genomic Precis Med* [Internet]. 2018 Mar 1 [cited 2022 Sep 29];11(3):e001937. Available from: <https://pubmed.ncbi.nlm.nih.gov/29555670/>
22. Snir S, Farrell C, Pellegrini M. Human epigenetic ageing is logarithmic with time across the entire lifespan. *Epigenetics* [Internet]. 2019 Sep 2 [cited 2022 Sep 30];14(9):912–26. Available from: <https://pubmed.ncbi.nlm.nih.gov/31138013/>
23. Rubbi L, Zhang H, Feng J, He C, Kurnia P, Ratan P, et al. The effects of age, sex, weight, and breed on canid methylomes. *Epigenetics* [Internet]. 2022 [cited 2022 Sep 30]; Available from: <https://pubmed.ncbi.nlm.nih.gov/35502722/>
24. Martino DJ, Tulic MK, Gordon L, Hodder M, Richman T, Metcalfe J, et al. Evidence for age-related and individual-specific changes in DNA methylation profile of mononuclear cells during early immune development in humans. *Epigenetics* [Internet]. 2011 [cited 2022 Sep 29];6(9):1085–94. Available from:

- <https://pubmed.ncbi.nlm.nih.gov/21814035/> 729
25. Herbstman JB, Wang S, Perera FP, Lederman SA, Vishnevetsky J, Rundle AG, et al. 730  
Predictors and consequences of global DNA methylation in cord blood and at three 731  
years. PLoS One [Internet]. 2013 Sep 4 [cited 2022 Sep 29];8(9). Available from: 732  
<https://pubmed.ncbi.nlm.nih.gov/24023780/> 733
26. Han L, Zhang H, Kaushal A, Rezwani FI, Kadalayil L, Karmaus W, et al. Changes in 734  
DNA methylation from pre-to post-adolescence are associated with pubertal 735  
exposures. Clin Epigenetics [Internet]. 2019 Dec 2 [cited 2022 Sep 29];11(1):1–14. 736  
Available from: 737  
[https://clinicalepigeneticsjournal.biomedcentral.com/articles/10.1186/s13148-019-](https://clinicalepigeneticsjournal.biomedcentral.com/articles/10.1186/s13148-019-0780-4) 738  
0780-4 739
27. Morris TJ, Butcher LM, Feber A, Teschendorff AE, Chakravarthy AR, Wojdacz TK, 740  
et al. ChAMP: 450k Chip Analysis Methylation Pipeline. Bioinformatics [Internet]. 741  
2014 Feb 1 [cited 2022 Sep 29];30(3):428–30. Available from: 742  
<https://academic.oup.com/bioinformatics/article/30/3/428/228299> 743
28. Teschendorff AE, Marabita F, Lechner M, Bartlett T, Tegner J, Gomez-Cabrero D, et 744  
al. A beta-mixture quantile normalization method for correcting probe design bias in 745  
Illumina Infinium 450 k DNA methylation data. 2013 Jan 15 [cited 2022 Sep 746  
29];29(2):189–96. Available from: 747  
<https://academic.oup.com/bioinformatics/article/29/2/189/204142> 748
29. Houseman EA, Accomando WP, Koestler DC, Christensen BC, Marsit CJ, Nelson 749  
HH, et al. DNA methylation arrays as surrogate measures of cell mixture distribution. 750  
BMC Bioinformatics [Internet]. 2012 May 8 [cited 2022 Sep 30];13(1):1–16. 751  
Available from: [https://bmcbioinformatics.biomedcentral.com/articles/10.1186/1471-](https://bmcbioinformatics.biomedcentral.com/articles/10.1186/1471-752)



|     |                                                                                                                                                                                                                                                                                                                                                                                                                                                                                                                                                                                                                                  |                                 |
|-----|----------------------------------------------------------------------------------------------------------------------------------------------------------------------------------------------------------------------------------------------------------------------------------------------------------------------------------------------------------------------------------------------------------------------------------------------------------------------------------------------------------------------------------------------------------------------------------------------------------------------------------|---------------------------------|
|     | 2105-13-86                                                                                                                                                                                                                                                                                                                                                                                                                                                                                                                                                                                                                       | 753                             |
| 30. | Robert B. Cleveland, William S. Cleveland, Jean E. McRae IT. STL: A Seasonal-<br>Trend Decomposition Procedure Based on Loess - ProQuest [Internet]. Journal of<br>official statistics. 1990 [cited 2022 Sep 30]. p. 3–73. Available from:<br><a href="https://www.proquest.com/docview/1266805989?parentSessionId=KC0re8G8D2YY70EegFfTWWxf7R6R6ipCvz%2Fezt%2Fxa%2BY%3D">https://www.proquest.com/docview/1266805989?parentSessionId=KC0re8G8D2YY</a><br><a href="https://www.proquest.com/docview/1266805989?parentSessionId=KC0re8G8D2YY70EegFfTWWxf7R6R6ipCvz%2Fezt%2Fxa%2BY%3D">70EegFfTWWxf7R6R6ipCvz%2Fezt%2Fxa%2BY%3D</a> | 754<br>755<br>756<br>757<br>758 |
| 31. | Kanehisa M, Goto S, Sato Y, Furumichi M, Tanabe M. KEGG for integration and<br>interpretation of large-scale molecular data sets. Nucleic Acids Res [Internet]. 2012<br>Jan [cited 2022 Sep 30];40(Database issue). Available from:<br><a href="https://pubmed.ncbi.nlm.nih.gov/22080510/">https://pubmed.ncbi.nlm.nih.gov/22080510/</a>                                                                                                                                                                                                                                                                                         | 759<br>760<br>761<br>762        |
| 32. | Lynch DR, Farmer JM, Balcer LJ, Wilson RB. Friedreich ataxia: Effects of genetic<br>understanding on clinical evaluation and therapy. Vol. 59, Archives of Neurology.<br>2002. p. 743–7.                                                                                                                                                                                                                                                                                                                                                                                                                                         | 763<br>764<br>765               |
| 33. | Tacutu R, Thornton D, Johnson E, Budovsky A, Barardo D, Craig T, et al. Human<br>Ageing Genomic Resources: new and updated databases. Jan [cited 2022 Sep<br>20];46(D1). Available from: <a href="https://pubmed.ncbi.nlm.nih.gov/29121237/">https://pubmed.ncbi.nlm.nih.gov/29121237/</a>                                                                                                                                                                                                                                                                                                                                       | 766<br>767<br>768               |
| 34. | Fernandes M, Wan C, Tacutu R, Barardo D, Rajput A, Wang J, et al. Systematic<br>analysis of the gerontome reveals links between aging and age-related diseases. 2016<br>Nov 1 [cited 2022 Sep 29];25(21):4804–18. Available from:<br><a href="https://pubmed.ncbi.nlm.nih.gov/28175300/">https://pubmed.ncbi.nlm.nih.gov/28175300/</a>                                                                                                                                                                                                                                                                                           | 769<br>770<br>771<br>772        |
| 35. | De Magalhães JP, Toussaint O. GenAge: A genomic and proteomic network map of<br>human ageing. FEBS Lett [Internet]. 2004 Jul 30 [cited 2022 Sep 30];571(1–3):243–<br>7. Available from: <a href="https://pubmed.ncbi.nlm.nih.gov/15280050/">https://pubmed.ncbi.nlm.nih.gov/15280050/</a>                                                                                                                                                                                                                                                                                                                                        | 773<br>774<br>775               |

36. Plank M, Wuttke D, Van Dam S, Clarke SA, De Magalhães JP. A meta-analysis of caloric restriction gene expression profiles to infer common signatures and regulatory mechanisms. *Mol Biosyst* [Internet]. 2012 Mar [cited 2022 Sep 29];8(4):1339–49. Available from: <https://pubmed.ncbi.nlm.nih.gov/22327899/>
37. Wuttke D, Connor R, Vora C, Craig T, Li Y, Wood S, et al. Dissecting the gene network of dietary restriction to identify evolutionarily conserved pathways and new functional genes. *PLoS Genet* [Internet]. 2012 Aug [cited 2022 Sep 29];8(8). Available from: <https://pubmed.ncbi.nlm.nih.gov/22912585/>
38. Avelar RA, Ortega JG, Tacutu R, Tyler EJ, Bennett D, Binetti P, et al. A multidimensional systems biology analysis of cellular senescence in aging and disease. *Genome Biol* [Internet]. 2020 Apr 7 [cited 2022 Sep 30];21(1). Available from: <https://pubmed.ncbi.nlm.nih.gov/32264951/>
39. Oliveros, J.C. (2007-2015) Venny. An Interactive Tool for Comparing Lists with Venn’s Diagrams. <https://bioinfogp.cnb.csic.es/tools/venny/index.html>.
40. El Khoudary SR, Greendale G, Crawford SL, Avis NE, Brooks MM, Thurston RC, et al. The menopause transition and women’s health at midlife: a progress report from the Study of Women’s Health Across the Nation (SWAN). *Menopause* [Internet]. 2019 Oct 1 [cited 2022 Sep 30];26(10):1213. Available from: [/pmc/articles/PMC6784846/](https://pubmed.ncbi.nlm.nih.gov/32264951/)
41. Miller JJ, Heather LC. Cardiometabolic risk factors vary with age differently in females and males. *Nat Cardiovasc Res* 2022 19 [Internet]. 2022 Sep 12 [cited 2022 Sep 30];1(9):796–7. Available from: <https://www.nature.com/articles/s44161-022-00130-9>
42. Gerdtts E, Regitz-Zagrosek V. Sex differences in cardiometabolic disorders. *Nat Med*

- 2019 2511 [Internet]. 2019 Nov 7 [cited 2022 Sep 29];25(11):1657–66. Available 800  
from: <https://www.nature.com/articles/s41591-019-0643-8> 801
43. Feldman HA, Longcope C, Derby CA, Johannes CB, Araujo AB, Coviello AD, et al. 802  
Age trends in the level of serum testosterone and other hormones in middle-aged 803  
men: longitudinal results from the Massachusetts male aging study. *J Clin Endocrinol* 804  
*Metab* [Internet]. 2002 [cited 2022 Sep 29];87(2):589–98. Available from: 805  
<https://pubmed.ncbi.nlm.nih.gov/11836290/> 806
44. Hildrum B, Mykletun A, Hole T, Midthjell K, Dahl AA. Age-specific prevalence of 807  
the metabolic syndrome defined by the International Diabetes Federation and the 808  
National Cholesterol Education Program: The Norwegian HUNT 2 study. *BMC* 809  
*Public Health* [Internet]. 2007 Aug 29 [cited 2022 Sep 29];7(1):1–9. Available from: 810  
<https://bmcpublikealth.biomedcentral.com/articles/10.1186/1471-2458-7-220> 811
45. Saeedi P, Petersohn I, Salpea P, Malanda B, Karuranga S, Unwin N, et al. Global and 812  
regional diabetes prevalence estimates for 2019 and projections for 2030 and 2045: 813  
Results from the International Diabetes Federation Diabetes Atlas, 9th edition. 814  
*Diabetes Res Clin Pract* [Internet]. 2019 Nov 1 [cited 2022 Sep 29];157. Available 815  
from: <https://pubmed.ncbi.nlm.nih.gov/31518657/> 816
46. Meyer MR, Haas E, Barton M. Gender Differences of Cardiovascular Disease. 817  
*Hypertension* [Internet]. 2006 Jun 1 [cited 2022 Sep 30];47(6):1019–26. Available 818  
from: <https://www.ahajournals.org/doi/abs/10.1161/01.HYP.0000223064.62762.0b> 819
47. Tsay YC, Chen CH, Pan WH. Ages at Onset of 5 Cardiometabolic Diseases 820  
Adjusting for Nonsusceptibility: Implications for the Pathogenesis of Metabolic 821  
Syndrome. *Am J Epidemiol* [Internet]. 2016 Sep 1 [cited 2022 Sep 29];184(5):366– 822  
77. Available from: <https://academic.oup.com/aje/article/184/5/366/2388960> 823

48. Pedrama A, Razandi M, Narayanan R, Dalton JT, McKinsey TA, Levin ER. Estrogen regulates histone deacetylases to prevent cardiac hypertrophy. *Mol Biol Cell* [Internet]. 2013 Dec 15 [cited 2022 Sep 29];24(24):3805–18. Available from: <https://www.molbiolcell.org/doi/10.1091/mbc.e13-08-0444>
49. Sessions AO, Engler AJ. Mechanical Regulation of Cardiac Aging in Model Systems. *Circ Res* [Internet]. 2016 May 13 [cited 2022 Sep 29];118(10):1553–62. Available from: <https://pubmed.ncbi.nlm.nih.gov/27174949/>
50. Vijil C, Hermansson C, Jeppsson A, Bergström G, Hultén LM. Arachidonate 15-Lipoxygenase Enzyme Products Increase Platelet Aggregation and Thrombin Generation. *PLoS One* [Internet]. 2014 Feb 12 [cited 2022 Sep 29];9(2):e88546. Available from: <https://journals.plos.org/plosone/article?id=10.1371/journal.pone.0088546>
51. Gertow K, Nobili E, Folkersen L, Newman JW, Pedersen TL, Ekstrand J, et al. 12- and 15-lipoxygenases in human carotid atherosclerotic lesions: Associations with cerebrovascular symptoms. *Atherosclerosis*. 2011 Apr 1;215(2):411–6.
52. Yan L, Vatner DE, O'Connor JP, Ivessa A, Ge H, Chen W, et al. Type 5 adenylyl cyclase disruption increases longevity and protects against stress. *Cell* [Internet]. 2007 Jul 27 [cited 2022 Sep 30];130(2):247–58. Available from: <https://pubmed.ncbi.nlm.nih.gov/17662940/>
53. Vatner SF, Yan L, Ishikawa Y, Vatner DE, Sadoshima J. Adenylyl cyclase type 5 disruption prolongs longevity and protects the heart against stress. *Circ J* [Internet]. 2009 [cited 2022 Sep 29];73(2):195–200. Available from: <https://pubmed.ncbi.nlm.nih.gov/19106458/>
54. Vatner SF, Pachon RE, Vatner DE. Inhibition of adenylyl cyclase type 5 increases

- longevity and healthful aging through oxidative stress protection. *Oxid Med Cell* 848
- Longev [Internet]. 2015 [cited 2022 Sep 29];2015. Available from: 849
- <https://pubmed.ncbi.nlm.nih.gov/25945149/> 850
55. Yakar S, Adamo ML. Insulin-like growth factor 1 physiology: lessons from mouse 851
- models. *Endocrinol Metab Clin North Am* [Internet]. 2012 Jun [cited 2022 Sep 852
- 30];41(2):231–47. Available from: <https://pubmed.ncbi.nlm.nih.gov/22682628/> 853
56. LeRoith D, Yakar S. Mechanisms of Disease: metabolic effects of growth hormone 854
- and insulin-like growth factor 1. *Nat Clin Pract Endocrinol Metab* 2007 33 [Internet]. 855
- 2007 Mar [cited 2022 Sep 30];3(3):302–10. Available from: 856
- <https://www.nature.com/articles/ncpendmet0427> 857
57. Rosenfeld RG. Insulin-like Growth Factors and the Basis of Growth. 858
- <https://doi.org/10.1056/NEJMp038156> [Internet]. 2003 Dec 4 [cited 2022 Sep 859
- 30];349(23):2184–6. Available from: 860
- <https://www.nejm.org/doi/full/10.1056/NEJMp038156> 861
58. Pawlikowska L, Hu D, Huntsman S, Sung A, Chu C, Chen J, et al. Association of 862
- common genetic variation in the insulin/IGF1 signaling pathway with human 863
- longevity. *Aging Cell* [Internet]. 2009 [cited 2022 Sep 30];8(4):460–72. Available 864
- from: <https://pubmed.ncbi.nlm.nih.gov/19489743/> 865
59. Kenyon C, Chang J, Gensch E, Rudner A, Tabtiang R. A *C. elegans* mutant that lives 866
- twice as long as wild type. *Nature* [Internet]. 1993 [cited 2022 Sep 867
- 30];366(6454):461–4. Available from: <https://pubmed.ncbi.nlm.nih.gov/8247153/> 868
60. Ock S, Lee WS, Ahn J, Kim HM, Kang H, Kim HS, et al. Deletion of IGF-1 869
- Receptors in Cardiomyocytes Attenuates Cardiac Aging in Male Mice. 870
- Endocrinology* [Internet]. 2016 Jan 1 [cited 2022 Sep 30];157(1):336–45. Available 871

- from: <https://pubmed.ncbi.nlm.nih.gov/26469138/> 872
61. Li M, Chiu JF, Gagne J, Fukagawa NK. Age-related differences in insulin-like 873  
growth factor-1 receptor signaling regulates Akt/FOXO3a and ERK/Fos pathways in 874  
vascular smooth muscle cells. *J Cell Physiol* [Internet]. 2008 Nov 1 [cited 2022 Sep 875  
30];217(2):377–87. Available from: 876  
<https://onlinelibrary.wiley.com/doi/full/10.1002/jcp.21507> 877
62. Calnan DR, Brunet A. The FoxO code. *Oncogene* [Internet]. 2008 Apr 7 [cited 2022 878  
Sep 30];27(16):2276–88. Available from: <https://pubmed.ncbi.nlm.nih.gov/18391970/> 879
63. Willcox BJ, Donlon TA, He Q, Chen R, Grove JS, Yano K, et al. FOXO3A genotype 880  
is strongly associated with human longevity. *Proc Natl Acad Sci U S A* [Internet]. 881  
2008 Sep 16 [cited 2022 Sep 30];105(37):13987–92. Available from: 882  
<https://www.pnas.org/doi/abs/10.1073/pnas.0801030105> 883
64. Flachsbart F, Caliebe A, Kleindorp R, Blanché H, Von Eller-Eberstein H, Nikolaus S, 884  
et al. Association of FOXO3A variation with human longevity confirmed in German 885  
centenarians. *Proc Natl Acad Sci U S A* [Internet]. 2009 Feb 2 [cited 2022 Sep 886  
30];106(8):2700. Available from: </pmc/articles/PMC2650329/> 887
65. Weichhart T. mTOR as Regulator of Lifespan, Aging, and Cellular Senescence: A 888  
Mini-Review. *Gerontology* [Internet]. 2018 Feb 1 [cited 2022 Sep 29];64(2):127–34. 889  
Available from: <https://pubmed.ncbi.nlm.nih.gov/29190625/> 890
66. Arriola Apelo SI, Lamming DW. Rapamycin: An InhibiTOR of Aging Emerges From 891  
the Soil of Easter Island. *J Gerontol A Biol Sci Med Sci* [Internet]. 2016 Jul 1 [cited 892  
2022 Sep 29];71(7):841–9. Available from: 893  
<https://pubmed.ncbi.nlm.nih.gov/27208895/> 894

67. Papadopoli D, Boulay K, Kazak L, Pollak M, Mallette FA, Topisirovic I, et al. mTOR 895  
as a central regulator of lifespan and aging. *F1000Research* [Internet]. 2019 [cited 896  
2022 Sep 29];8. Available from: </pmc/articles/PMC6611156/> 897
68. Yu M, Zhang H, Wang B, Zhang Y, Zheng X, Shao B, et al. Key Signaling Pathways 898  
in Aging and Potential Interventions for Healthy Aging. *Cells* [Internet]. 2021 Mar 1 899  
[cited 2022 Sep 29];10(3):1–26. Available from: </pmc/articles/PMC8002281/> 900
69. Albert V, Hall MN. mTOR signaling in cellular and organismal energetics. *Curr Opin 901  
Cell Biol* [Internet]. 2015 [cited 2022 Sep 29];33(1):55–66. Available from: 902  
<https://pubmed.ncbi.nlm.nih.gov/25554914/> 903
70. Chellappa K, Brinkman JA, Mukherjee S, Morrison M, Alotaibi MI, Carbajal KA, et 904  
al. Hypothalamic mTORC2 is essential for metabolic health and longevity. *Aging 905  
Cell* [Internet]. 2019 Oct 1 [cited 2022 Sep 29];18(5). Available from: 906  
</pmc/articles/PMC6718533/> 907
71. Juvinao-Quintero DL, Marioni RE, Ochoa-Rosales C, Russ TC, Deary IJ, van Meurs 908  
JBJ, et al. DNA methylation of blood cells is associated with prevalent type 2 909  
diabetes in a meta-analysis of four European cohorts. *Clin Epigenetics* [Internet]. 910  
2021 Dec 1 [cited 2022 Sep 30];13(1):1–14. Available from: 911  
[https://clinicalepigeneticsjournal.biomedcentral.com/articles/10.1186/s13148-021- 912  
01027-3](https://clinicalepigeneticsjournal.biomedcentral.com/articles/10.1186/s13148-021-01027-3) 913
72. Cardona A, Day FR, Perry JRB, Loh M, Chu AY, Lehne B, et al. Epigenome-wide 914  
association study of incident type 2 diabetes in a British population: EPIC-Norfolk 915  
study. *Diabetes* [Internet]. 2019 Dec 1 [cited 2022 Sep 30];68(12):2315–26. Available 916  
from: <https://pubmed.ncbi.nlm.nih.gov/31506343/> 917
73. Walaszczyk E, Luijten M, Spijkerman AMW, Bonder MJ, Lutgers HL, Snieder H, et 918

- al. DNA methylation markers associated with type 2 diabetes, fasting glucose and 919  
HbA1c levels: a systematic review and replication in a case-control sample of the 920  
Lifelines study. *Diabetologia* [Internet]. 2018 Feb 1 [cited 2022 Sep 30];61(2):354– 921  
68. Available from: <https://pubmed.ncbi.nlm.nih.gov/29164275/> 922
74. Lewinska A, Adamczyk-Grochala J, Kwasniewicz E, Wnuk M. Downregulation of 923  
methyltransferase Dnmt2 results in condition-dependent telomere shortening and 924  
senescence or apoptosis in mouse fibroblasts. *J Cell Physiol* [Internet]. 2017 Dec 1 925  
[cited 2022 Sep 29];232(12):3714–26. Available from: 926  
<https://pubmed.ncbi.nlm.nih.gov/28177119/> 927
75. Li Z, Qi X, Zhang X, Yu L, Gao L, Kong W, et al. TRDMT1 exhibited protective 928  
effects against LPS-induced inflammation in rats through TLR4-NF- $\kappa$ B/MAPK-TNF- 929  
 $\alpha$  pathway. *Anim Model Exp Med* [Internet]. 2022 Apr 1 [cited 2022 Sep 930  
29];5(2):172–82. Available from: <https://pubmed.ncbi.nlm.nih.gov/35474613/> 931  
932  
933  
934
